# Supplementary material for: Combinatorial Effects of Soluble, Insoluble, and Organic Extracts from Jerusalem Artichokes on Gut Microbiota in Mice
Source: MDPI journal article supplement (doi:10.3390/microorganisms8060954), 2020-06-24
Supplement: s1 [file s1]

Table.S1 PERMANOVA at aim 2

| Test statics<br>( <i>p</i> value) | Cont. | A                  | B                  | C                  | B+C                 |
|-----------------------------------|-------|--------------------|--------------------|--------------------|---------------------|
| Cont.                             | -     | 11.512<br>(0.012*) | 9.168<br>(0.008**) | 0.725<br>(0.707)   | 14.110<br>(0.007**) |
| A                                 |       | -                  | 1.386<br>(0.273)   | 8.921<br>(0.015*)  | 2.878<br>(0.036*)   |
| B                                 |       |                    | -                  | 5.772<br>(0.009**) | 1.317<br>(0.319)    |
| C                                 |       |                    |                    | -                  | 7.903<br>(0.012*)   |
| B+C                               |       |                    |                    |                    | -                   |

\*\*  $p < 0.01$ , \*  $p < 0.05$ ; PERMANOVA

Table.S2 PERMANOVA at aim 3

| Test<br>statics<br>( <i>p</i> value) | Cont. | A                  | B'                 | D                  | E                  | B'+D               | B'+E               |
|--------------------------------------|-------|--------------------|--------------------|--------------------|--------------------|--------------------|--------------------|
| Cont.                                | -     | 2.064<br>(0.003**) | 3.518<br>(0.002**) | 4.486<br>(0.002**) | 1.598<br>(0.006**) | 4.154<br>(0.005**) | 1.980<br>(0.001**) |
| A                                    |       | -                  | 1.450<br>(0.041*)  | 1.705<br>(0.002**) | 1.554<br>(0.002**) | 1.868<br>(0.007**) | 1.269<br>(0.043*)  |
| B'                                   |       |                    | -                  | 1.109<br>(0.081)   | 2.139<br>(0.003**) | 1.075<br>(0.203)   | 1.400<br>(0.044*)  |
| D                                    |       |                    |                    | -                  | 3.086<br>(0.003**) | 1.016<br>(0.232)   | 2.092<br>(0.003**) |
| E                                    |       |                    |                    |                    | -                  | 2.733<br>(0.003**) | 1.501<br>(0.006**) |
| B'+D                                 |       |                    |                    |                    |                    | -                  | 1.814<br>(0.008**) |
| B'+E                                 |       |                    |                    |                    |                    |                    | -                  |

\*\*  $p < 0.01$ , \*  $p < 0.05$ ; PERMANOVA
