# Supplementary figures and images for: Combinatorial Effects of Soluble, Insoluble, and Organic Extracts from Jerusalem Artichokes on Gut Microbiota in Mice
Source: MDPI journal article supplement (doi:10.3390/microorganisms8060954), 2020-06-24

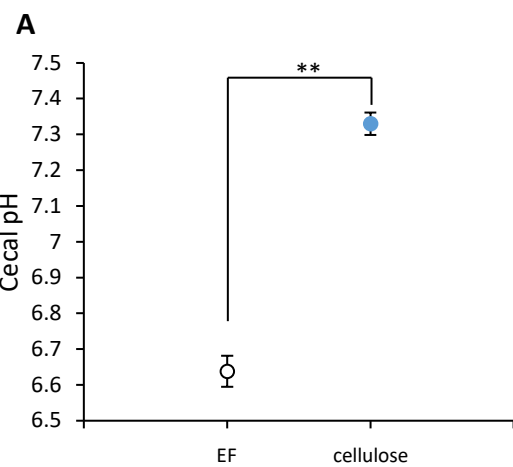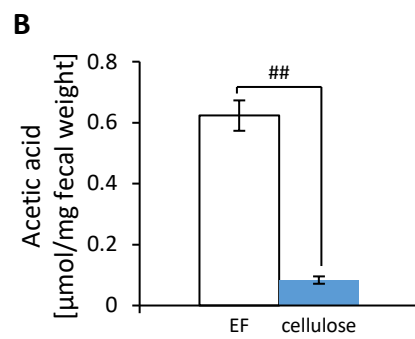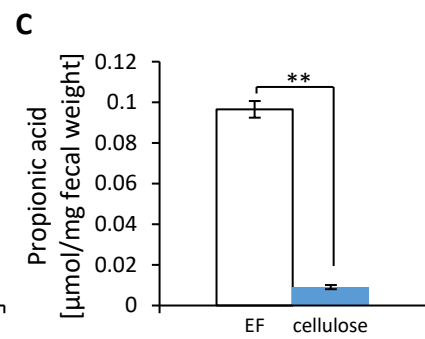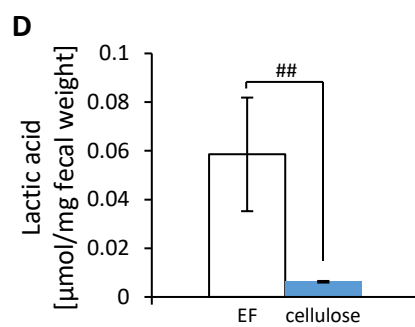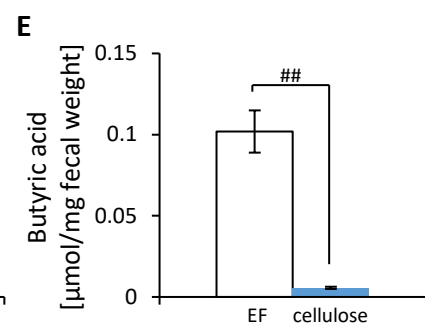

Supplement: s1 [file s1]
